# Supplementary material
Source: PubMed Central journal article supplement (PMC1413800)

CD62L<sup>+</sup> CD25<sup>+</sup> CD4<sup>+</sup>

CD62L<sup>-</sup> CD25<sup>+</sup> CD4<sup>+</sup>

cultured with IL2

cultured with IL2

Allogeneic DC

Syngeneic DC

Allogeneic DC

Syngeneic DC

Fresh  
CD25<sup>+</sup>CD4<sup>+</sup>

1  
week

2  
weeks

CD25

CD62L

GITR

CD103

Control

CD25

CD62L

GITR

CD103

Control

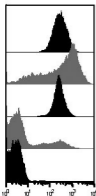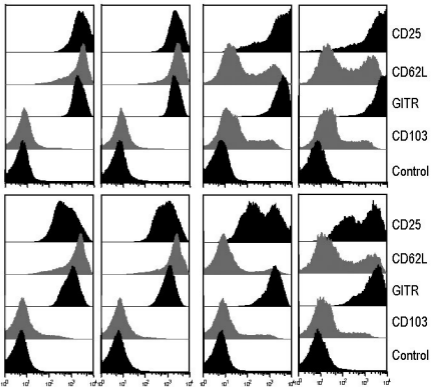

Supplement: pnas_0510606103_1.pdf [file pnas_0510606103_1.pdf]
